# Supplementary material for: Comparative Study on Phytochemical Profiles and Antioxidant Capacities of Chestnuts Produced in Different Geographic Area in China
Source: PubMed Central journal article supplement (PMC7139719; doi:10.3390/antiox9030190), 2020-02-25
Supplement: antioxidants-09-00190-s001.pdf [file antioxidants-09-00190-s001.pdf]

**Supplemental Table 1.** The maximum detection wavelengths, retention time, regressive equations and correlation coefficient of 14 phenolic acids

| Code | Name                                     | Detection wavelength | Retention time (min) | Regression equation    | R <sup>2</sup> |
|------|------------------------------------------|----------------------|----------------------|------------------------|----------------|
| 1    | Gallic acid                              | 220 nm               | 8.95                 | $y = 226998x$          | 0.9994         |
| 2    | Protocatechuic acid                      | 220 nm               | 15.86                | $y = 188665x + 3486.9$ | 0.9997         |
| 3    | 2,3,4-Trihydroxybenzoic acid             | 260 nm               | 18.14                | $y = 142439x - 131628$ | 0.9994         |
| 4    | Protocatechualdehyde                     | 230 nm               | 21.97                | $y = 158161x - 7692$   | 0.9998         |
| 5    | <i>p</i> -Hydroxybenzoic acid            | 260 nm               | 24.55                | $y = 229679x + 419.61$ | 0.9998         |
| 6    | Gentisic acid                            | 210 nm               | 27.29                | $y = 317082x - 4429.3$ | 0.9997         |
| 7    | Chlorogenic acid                         | 320 nm               | 31.55                | $y = 111727x - 6976.3$ | 0.9998         |
| 8    | Vanillic acid + Caffeic acid             | 220 nm               | 32.90                | $y = 366259x + 8460.1$ | 0.9998         |
| 9    | Syringic acid                            | 220 nm               | 38.69                | $y = 322482x + 18809$  | 0.9997         |
| 10   | Vanillin                                 | 230 nm               | 39.57                | $y = 6538.8x - 3890.8$ | 0.9998         |
| 11   | <i>p</i> -Coumaric acid + Syringaldehyde | 320 nm               | 45.11                | $y = 327787x - 47265$  | 0.9998         |
| 12   | Ferulic acid                             | 320 nm               | 51.60                | $y = 168386x - 22016$  | 0.9998         |
| 13   | Sinapic acid                             | 320 nm               | 54.47                | $y = 214299x - 29985$  | 0.9997         |
| 14   | Salicylic acid                           | 240 nm               | 64.29                | $y = 132746x - 23350$  | 0.9997         |

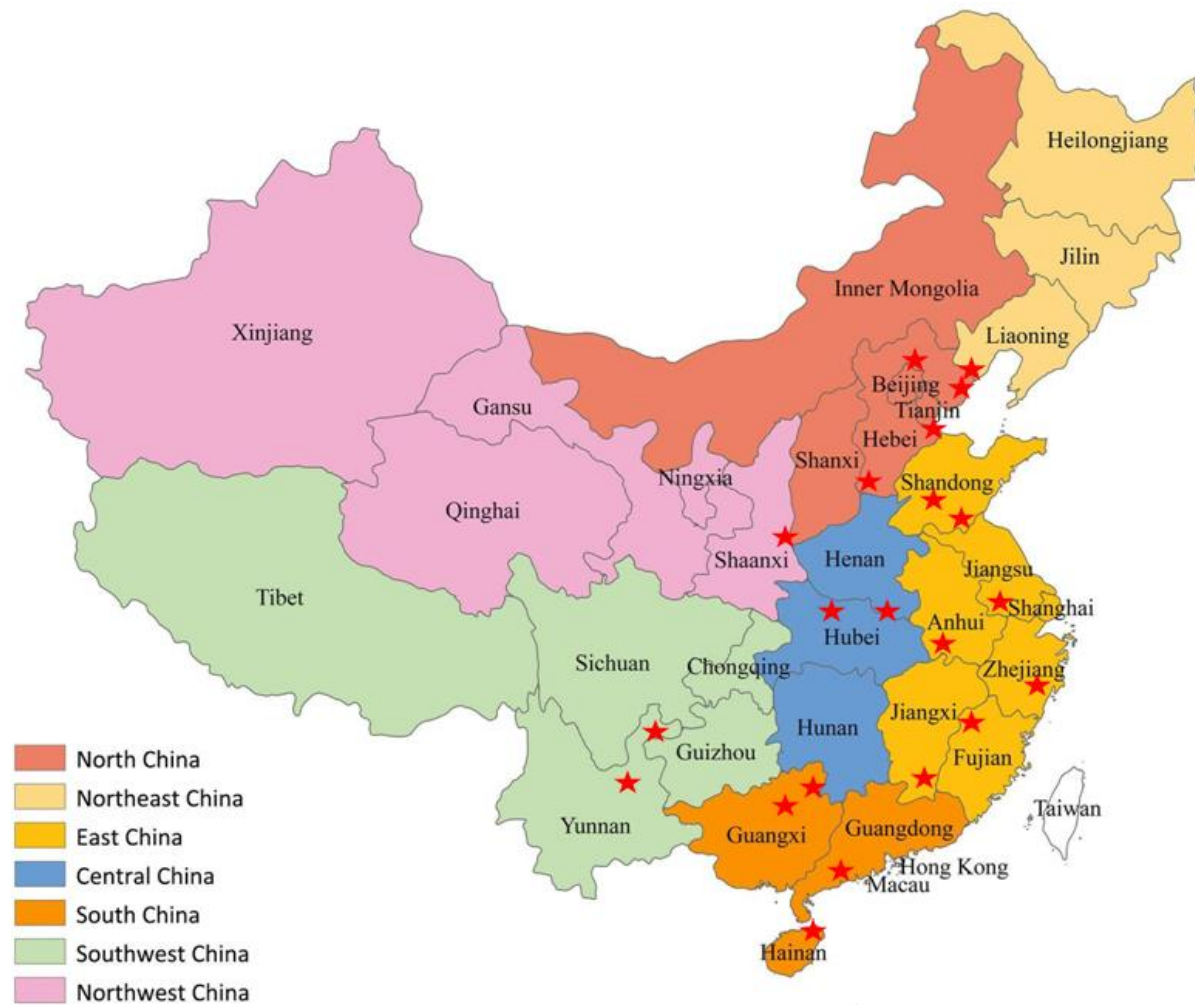

Supplemental Fig 1. Chestnut sampling regions in China (marked by stars)

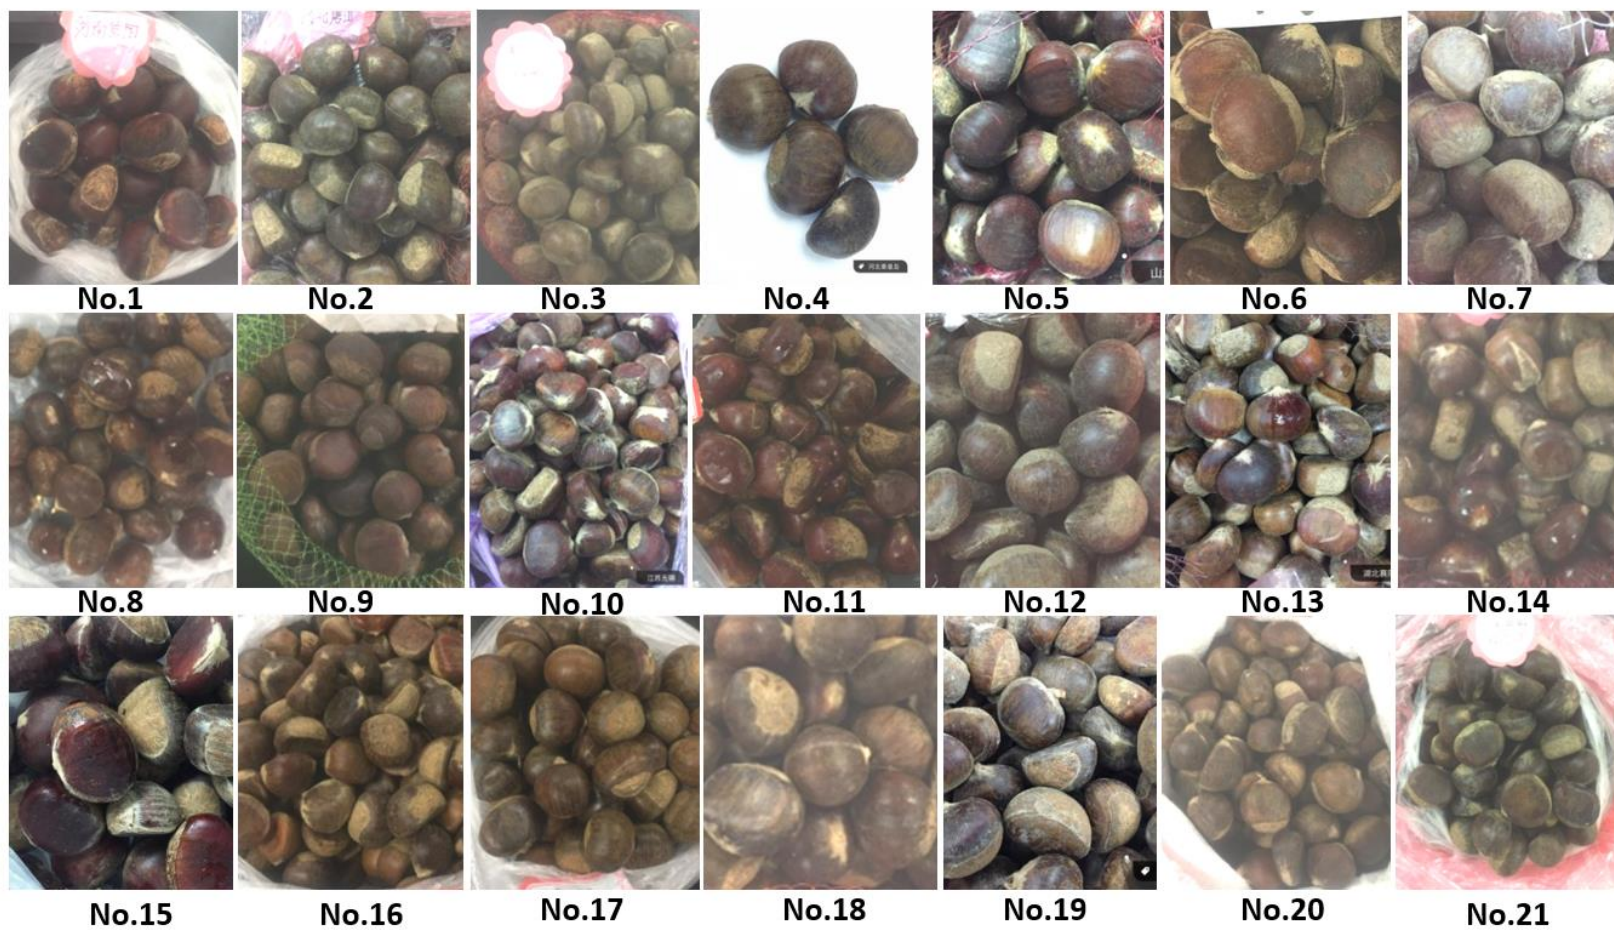

Supplemental Fig. 2. Twenty one raw chestnut samples investigated in this study.

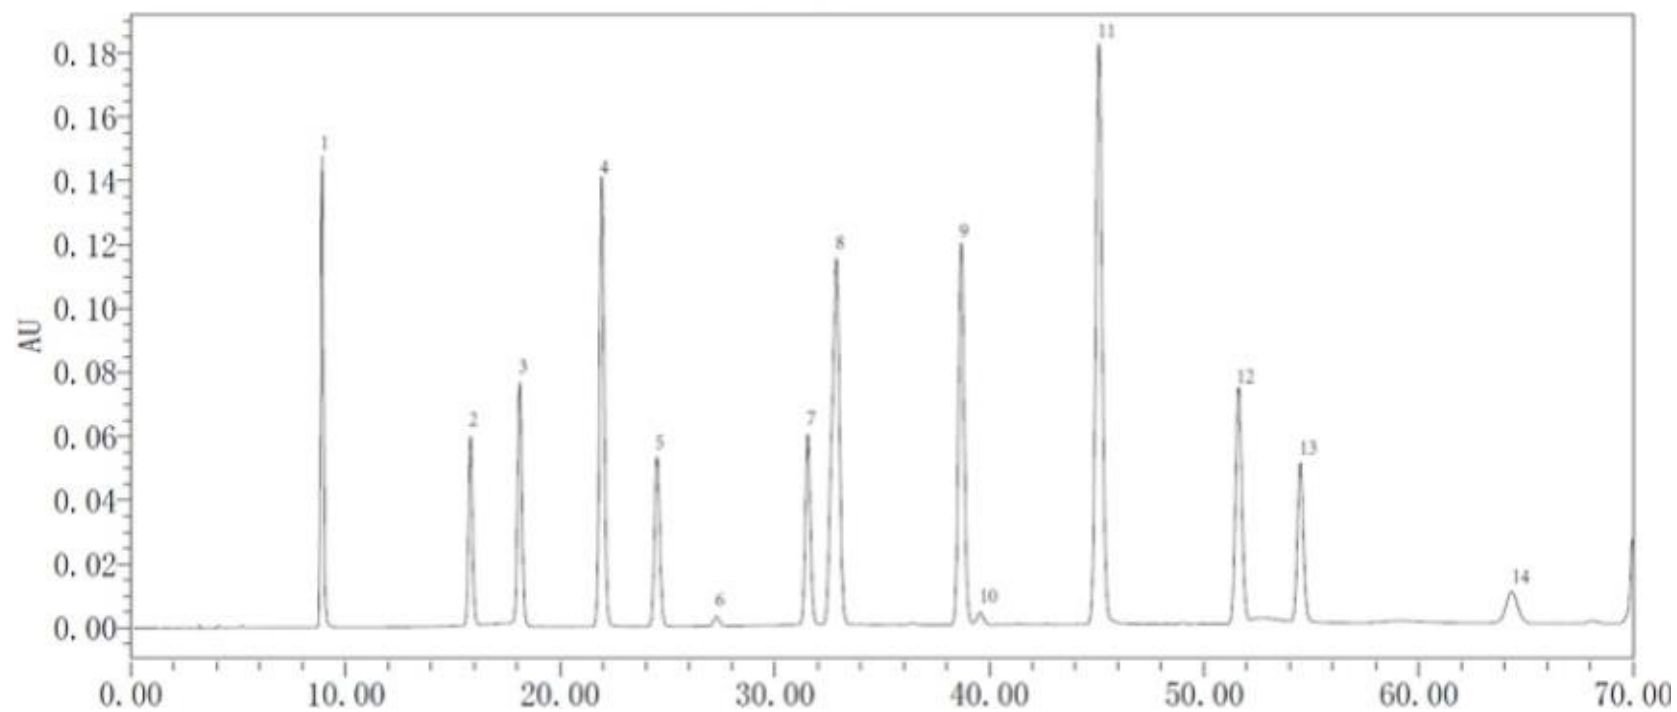

**Supplemental Fig. 3.** Chromatogram of 14 phenolic acids.

1: Gallic acid; 2: Protocatechuic acid; 3: 2,3,4-trihydroxybenzoic acid; 4: Protocatechualdehyde; 5: p-hydroxybenzoic acid; 6: Gentisic acid; 7: Chlorogenic acid; 8: Vanillic acid+Caffeic acid; 9: Syringic acid; 10: Vanillin; 11: p-coumaric acid+Syringaldehyde; 12: Ferulic acid; 13: Sinapic acid; 14: Salicylic acid.

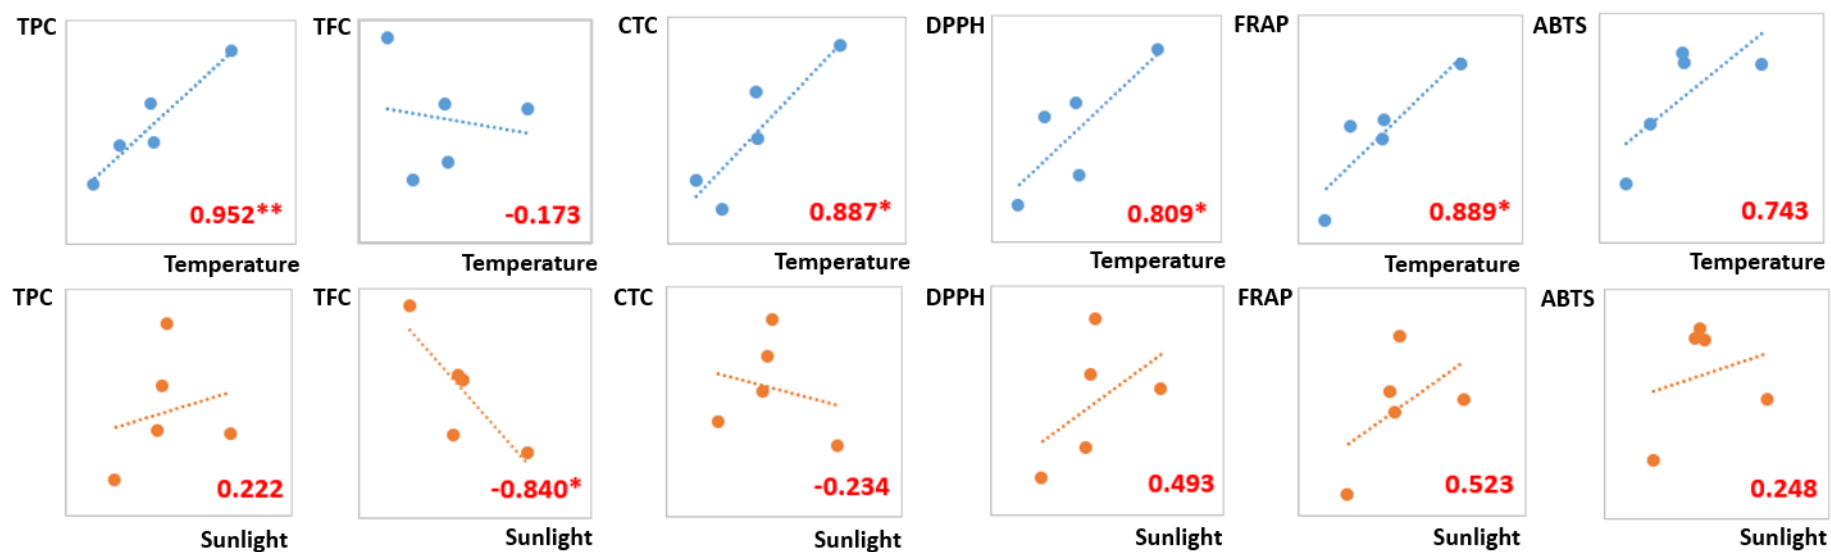

**Supplemental Fig 4.** Correlation coefficient (r) between temperature and sunlight with phenolic contents and antioxidant activities
